# Supplementary material
Source: PubMed Central journal article supplement (PMC7993656)
Supplement: NIHMS1660222-supplement-Supplementary_file.pdf [file NIHMS1660222-supplement-Supplementary_file.pdf]

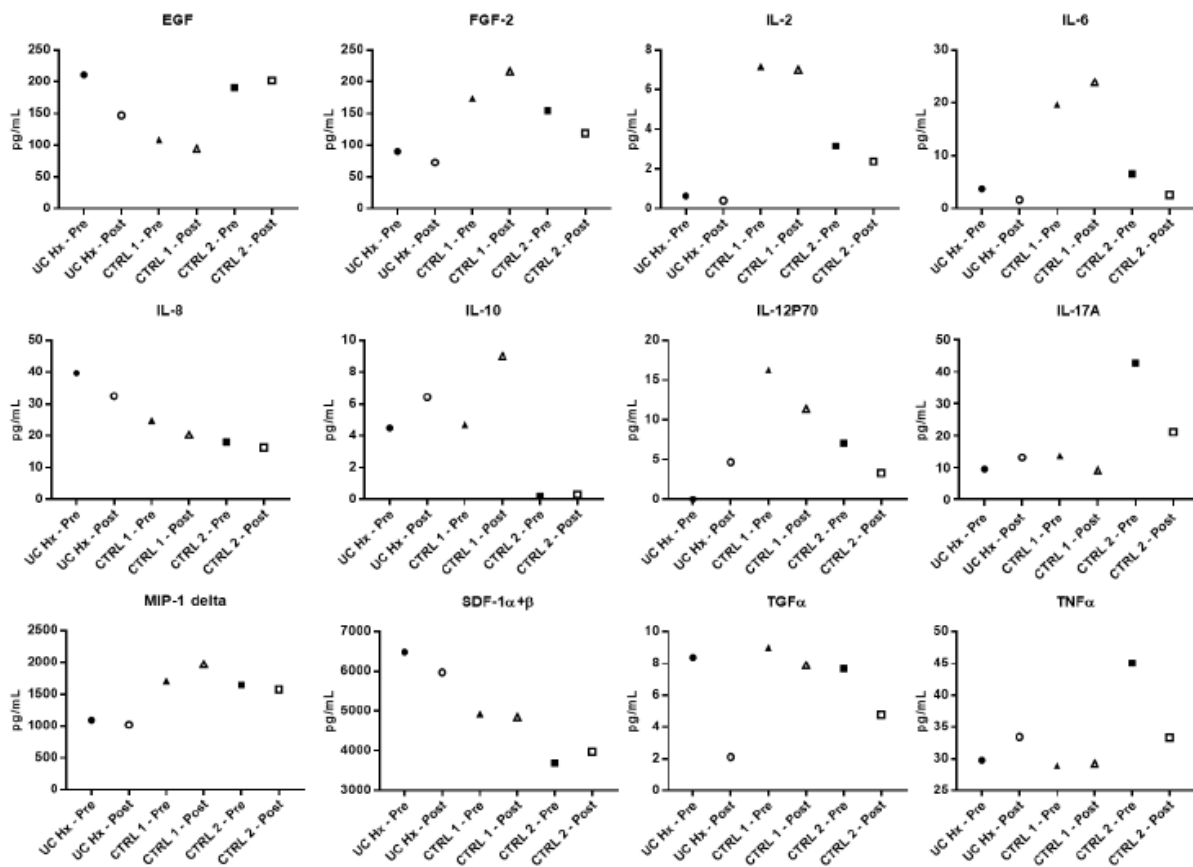

**Supplementary Figure 1:** Cytokine and chemokine levels pre-and post-CPI therapy. Additional cytokine and chemokine levels pre- and post-CPI therapy for case patient with ulcerative colitis and two control patients without underlying colitis or other autoimmune diseases. Data represent average of replicate analytes.
